# Supplementary material
Source: PubMed Central journal article supplement (PMC5100764)
Supplement: supp_pp.16.00808_PP2016-00808R2_Supplemental_Table_S1.pdf [file supp_pp.16.00808_PP2016-00808R2_Supplemental_Table_S1.pdf]

**Table S1: Primers used in this study.**

Nucleotide sequence of gene-specific primers for q-PCR

|                 |     |                                 |
|-----------------|-----|---------------------------------|
| <i>AtWRKY11</i> | Fw  | 5'-ACGGACAAAAACCGATCAAG-3'      |
| <i>AtWRKY11</i> | Rev | 5'-AAGCCGAGGCAAACACTAAA-3'      |
| <i>AtWRKY29</i> | Fw  | 5'-GCGTAACGGGCAGAAAC-3'         |
| <i>AtWRKY29</i> | Rev | 5'-GGTTTGGGTTGGGAAGTTTT-3'      |
| <i>AtRbohD</i>  | Fw  | 5'-CCTATGAGCCGATGGAAAAA-3'      |
| <i>AtRbohD</i>  | Rev | 5'-TACCAAAGGCGTTGAAACC-3'       |
| <i>AtPR1</i>    | Fw  | 5'-TTCTCCCTCGAAAGCTCAA-3'       |
| <i>AtPR1</i>    | Rev | 5'-CATGGGACCTACGCCTACC-3'       |
| <i>AtALD1</i>   | Fw  | 5'-GTGCAAGATCCTACCTTCCCGGC-3'   |
| <i>AtALD1</i>   | Rev | 5'-CGGTCCTGGGGTCATAGCCAGA-3'    |
| <i>AtFMO1</i>   | Fw  | 5'-CTTCCGAACTTGGCTTGAG-3'       |
| <i>AtFMO1</i>   | Rev | 5'-AAGTTCGAGCTGCTTTGGAC-3'      |
| <i>AtUBC9</i>   | Fw  | 5'-TGGATCGTGGGATTTTGGAAATGGC-3' |
| <i>AtUBC9</i>   | Rev | 5'-GCAACGGGTCCTGCGCTACAT-3'     |
